# Supplementary material
Source: publisher figshare collection journal article supplement (https://gsajournals.figshare.com/articles/dataset/_/12780461)
Supplement: Supplementary file 4 [file 1]

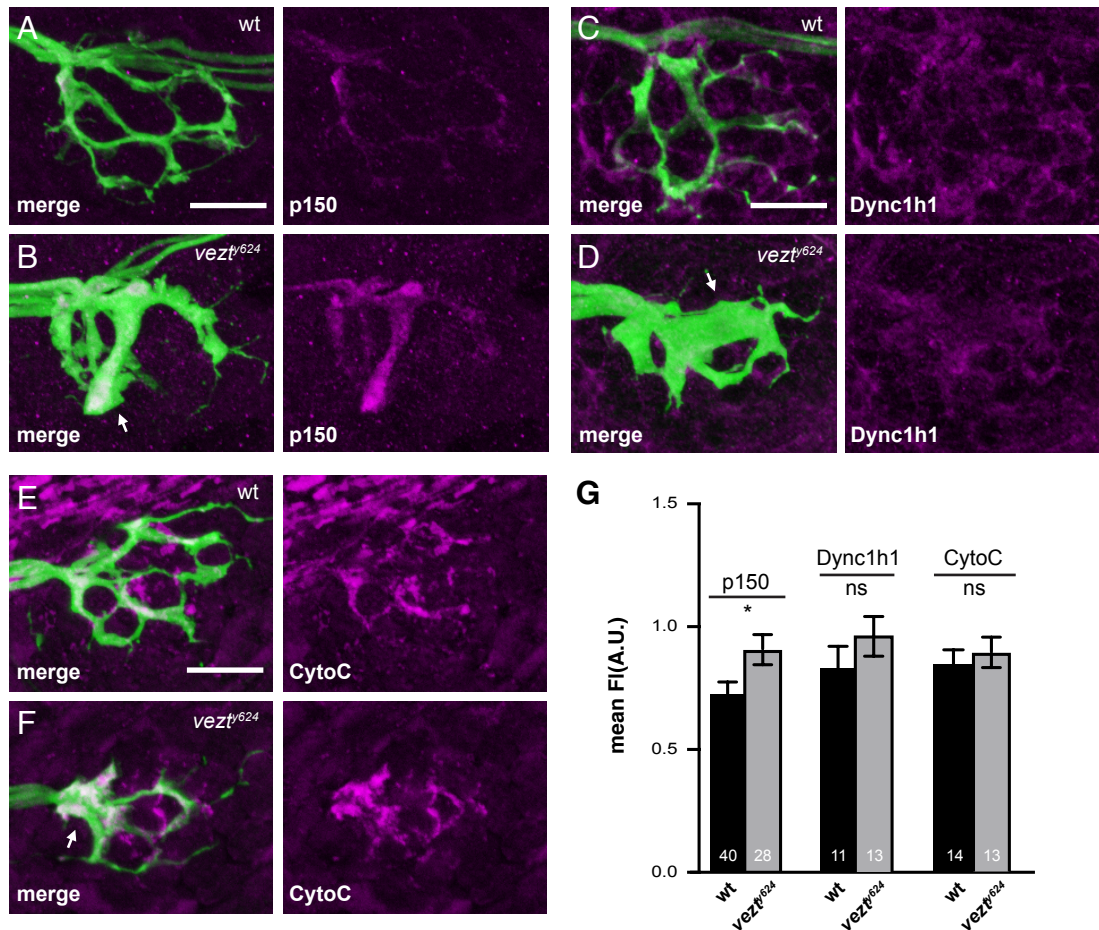

#### Figure S4. p150 accumulates in *vez<sup>t</sup>* mutant axon terminals

(A-F) Immunofluorescence analysis of the dynactin component p150, Dynein Heavy Chain (Dync1h1), and mitochondria (CytoC) in zebrafish pLL axon terminals marked by cytoplasmic GFP (green) in the *TgBAC(neurod:egfp)nl1* transgenic line. Arrows point to axon terminal swellings in *vez<sup>t</sup>624* mutants. Scale bar is 10  $\mu$ m.

(G) Quantification of (A-F). Values were normalized to background. p150 but not Dync1h1 or CytoC accumulates significantly in *vez<sup>t</sup>624* mutant terminals. n = animals, indicated on each bar. Error bars indicate SEM.

\*p<0.05, ns = not significant, based on two-way ANOVA. Means, SEMs, and p values are available in Table S1.
