# Supplementary material
Source: publisher figshare collection journal article supplement (https://gsajournals.figshare.com/articles/dataset/_/12780461)
Supplement: Supplementary file 5 [file 1]

**Table S1. Numerical values for bar graphs in Figures 1-7 and Figures S2-S4.**

| Figure   | Panel |                                           | Mean  | SEM +/- | n= | comparison                                                                 | p-value   | Bonferroni-corrected p |
|----------|-------|-------------------------------------------|-------|---------|----|----------------------------------------------------------------------------|-----------|------------------------|
| Figure 1 | E     | wt                                        | 10.34 | 2.1     | 10 | wt to vezl <sup>721</sup>                                                  | 4.75E-08  | 9.50E-08               |
|          |       | vezl <sup>721</sup>                       | 39.25 | 1.7     | 10 | vezl <sup>721</sup> to vezl <sup>721</sup> + vezl <sup>wt</sup> (rescue)   | 4.11E-10  | 8.22E-10               |
|          |       | vezl <sup>13.1</sup>                      | 33.93 | 1.4     | 10 |                                                                            |           |                        |
|          |       | vezl <sup>721</sup> + vezl <sup>wt</sup>  | 10.48 | 1.6     | 12 |                                                                            |           |                        |
| Figure 2 | I     | wt                                        | 35    | 1.9     | 14 | wt to vezl <sup>13.1</sup>                                                 | 0.0001727 | 0.000691               |
|          |       | vezl <sup>13.1</sup>                      | 23.16 | 1.8     | 12 | wt to vezl <sup>13.1</sup> + vezl <sup>wt</sup> (rescue)                   | 0.7638    | 3.06                   |
|          |       | vezl <sup>13.1</sup> + vezl <sup>wt</sup> | 35.92 | 1.9     | 12 | vezl <sup>13.1</sup> to vezl <sup>13.1</sup> + vezl <sup>wt</sup> (rescue) | 0.0035    | 0.014                  |
|          |       | vezl <sup>wt</sup> + vezl <sup>wt</sup>   | 42.1  | 3.1     | 10 | wt to wt + vezl <sup>wt</sup> (OE)                                         | 0.0656    | 0.2624                 |
|          | J     | wt                                        | 10.57 | 1.12    | 14 | wt to vezl <sup>13.1</sup>                                                 | 0.000031  | 0.000124               |
|          |       | vezl <sup>13.1</sup>                      | 23.87 | 2.5     | 12 | wt to vezl <sup>13.1</sup> + vezl <sup>wt</sup> (rescue)                   | 0.5925    | 2.37                   |
|          |       | vezl <sup>13.1</sup> + vezl <sup>wt</sup> | 11.49 | 0.76    | 12 | vezl <sup>13.1</sup> to vezl <sup>13.1</sup> + vezl <sup>wt</sup> (rescue) | 0.00018   | 0.00072                |
|          |       | vezl <sup>wt</sup> + vezl <sup>wt</sup>   | 18.93 | 2.1     | 10 | wt to wt + vezl <sup>wt</sup> (OE)                                         | 0.002121  | 0.00848                |
|          | K     | wt                                        | 0.96  | 0.04    | 14 | wt to vezl <sup>13.1</sup>                                                 | 2.03E-08  | 8.12E-08               |
|          |       | vezl <sup>13.1</sup>                      | 1.59  | 0.075   | 12 | wt to vezl <sup>13.1</sup> + vezl <sup>wt</sup> (rescue)                   | 0.5499    | 2.2                    |
|          |       | vezl <sup>13.1</sup> + vezl <sup>wt</sup> | 0.94  | 0.076   | 12 | vezl <sup>13.1</sup> to vezl <sup>13.1</sup> + vezl <sup>wt</sup> (rescue) | 8.68E-06  | 3.47E-05               |
|          |       | vezl <sup>wt</sup> + vezl <sup>wt</sup>   | 0.95  | 0.064   | 10 | wt to wt + vezl <sup>wt</sup> (OE)                                         | 0.6124    | 2.45                   |
|          | L     | wt                                        | 1.28  | 0.32    | 14 | wt to vezl <sup>13.1</sup>                                                 | 7.36E-06  | 2.94E-05               |
|          |       | vezl <sup>13.1</sup>                      | 5.42  | 0.69    | 12 | wt to vezl <sup>13.1</sup> + vezl <sup>wt</sup> (rescue)                   | 0.1812    | 0.7248                 |
|          |       | vezl <sup>13.1</sup> + vezl <sup>wt</sup> | 2.67  | 0.88    | 12 | vezl <sup>13.1</sup> to vezl <sup>13.1</sup> + vezl <sup>wt</sup> (rescue) | 0.029     | 0.116                  |
|          |       | vezl <sup>wt</sup> + vezl <sup>wt</sup>   | 7.8   | 1.64    | 10 | wt to wt + vezl <sup>wt</sup> (OE)                                         | 0.000381  | 0.001524               |
| Figure 3 | I     | wt ANF:GFP                                | 1.24  | 0.11    | 15 | wt to vezl <sup>13.1</sup> (ANF:GFP)                                       | 0.007953  |                        |
|          |       | vezl <sup>13.1</sup> ANF:GFP              | 1.62  | 0.09    | 10 |                                                                            |           |                        |
|          |       | wt YFP:Rab5                               | 1.1   | 0.04    | 16 | wt to vezl <sup>13.1</sup> (YFP:Rab5)                                      | 0.0001801 |                        |
|          |       | vezl <sup>13.1</sup> YFP:Rab5             | 1.72  | 0.04    | 10 |                                                                            |           |                        |
|          |       | wt Rab7:GFP                               | 0.92  | 0.09    | 14 | wt to vezl <sup>13.1</sup> (Rab7:GFP)                                      | 0.0001445 |                        |
|          |       | vezl <sup>13.1</sup> Rab7:GFP             | 1.98  | 0.27    | 12 |                                                                            |           |                        |
|          |       | wt Rab11:GFP                              | 1.21  | 0.06    | 16 | wt to vezl <sup>13.1</sup> (Rab11:GFP)                                     | 0.5895    |                        |
|          |       | vezl <sup>13.1</sup> Rab11:GFP            | 1.27  | 0.26    | 14 |                                                                            |           |                        |
| Figure 4 | E     | wt Tkv:mCherry                            | 1.02  | 0.04    | 14 | wt to vezl <sup>13.1</sup> (Tkv:mCherry)                                   | 0.0004521 |                        |
|          |       | vezl <sup>13.1</sup> Tkv:mCherry          | 1.92  | 0.14    | 15 |                                                                            |           |                        |
|          |       | wt anti-pMAD                              | 1.12  | 0.08    | 12 | wt to vezl <sup>13.1</sup> (anti-pMAD)                                     | 0.007105  |                        |
|          |       | vezl <sup>13.1</sup> anti-pMAD            | 1.52  | 0.103   | 15 |                                                                            |           |                        |
| Figure 5 | C     | wt Tkv:mCherry In                         | 0.25  | 0.075   | 5  | wt to vezl <sup>13.1</sup> (Tkv:mCherry In)                                | 0.4253    |                        |
|          |       | wt Tkv:mCherry Out                        | 1.05  | 0.063   | 5  |                                                                            |           |                        |
|          |       | vezl <sup>13.1</sup> Tkv:mCherry In       | 0.11  | 0.086   | 7  | wt to vezl <sup>13.1</sup> (Tkv:mCherry Out)                               | 0.009173  |                        |
|          |       | vezl <sup>13.1</sup> Tkv:mCherry Out      | 0.048 | 0.024   | 7  |                                                                            |           |                        |
|          | F     | wt ANF:GFP In                             | 1.23  | 0.2     | 9  | wt to vezl <sup>13.1</sup> (ANF:GFP In)                                    | 0.7126    |                        |
|          |       | wt ANF:GFP Out                            | 1.79  | 0.39    | 9  |                                                                            |           |                        |
|          |       | vezl <sup>13.1</sup> ANF:GFP In           | 1.37  | 0.32    | 6  | wt to vezl <sup>13.1</sup> (ANF:GFP Out)                                   | 0.7807    |                        |
|          |       | vezl <sup>13.1</sup> ANF:GFP Out          | 1.48  | 0.33    | 6  |                                                                            |           |                        |

| Figure   | Panel |                                  | Mean  | SEM +/- | n= | comparison                               | p-value   |
|----------|-------|----------------------------------|-------|---------|----|------------------------------------------|-----------|
| Figure 6 | F     | wt ANF:GFP                       | 0.96  | 0.06    | 6  | wt to vezl <sup>13.1</sup> (ANF:GFP)     | 0.0005902 |
|          |       | vezl <sup>13.1</sup> ANF:GFP     | 0.57  | 0.06    | 7  |                                          |           |
|          |       | wt Tkv:mCherry                   | 0.72  | 0.09    | 6  | wt to vezl <sup>13.1</sup> (Tkv:mCherry) | 0.00825   |
|          |       | vezl <sup>13.1</sup> Tkv:mCherry | 0.28  | 0.03    | 6  |                                          |           |
|          |       | wt mito:GFP                      | 0.25  | 0.025   | 7  | wt to vezl <sup>13.1</sup> (mito:GFP)    | 0.3479    |
|          |       | vezl <sup>13.1</sup> mito:GFP    | 0.234 | 0.013   | 5  |                                          |           |
|          | G     | wt ANF:GFP                       | 0.12  | 0.03    | 6  | wt to vezl <sup>13.1</sup> (ANF:GFP)     | 0.0007503 |
|          |       | vezl <sup>13.1</sup> ANF:GFP     | 0.39  | 0.072   | 7  |                                          |           |
|          |       | wt Tkv:mCherry                   | 0.12  | 0.048   | 6  | wt to vezl <sup>13.1</sup> (Tkv:mCherry) | 0.0009128 |
|          |       | vezl <sup>13.1</sup> Tkv:mCherry | 0.55  | 0.067   | 6  |                                          |           |
|          |       | wt mito:GFP                      | 0.66  | 0.012   | 7  | wt to vezl <sup>13.1</sup> (mito:GFP)    | 0.01058   |
|          |       | vezl <sup>13.1</sup> mito:GFP    | 0.25  | 0.025   | 5  |                                          |           |

|   |                                                |       |        |    |                                                      |            |
|---|------------------------------------------------|-------|--------|----|------------------------------------------------------|------------|
| H | wt ANF:GFP (anterograde)                       | 55.4  | 2.89   | 6  | wt to vezl <sup>13.1</sup> (ANF:GFP)                 | 8.64E-09   |
|   | vezl <sup>13.1</sup> ANF:GFP (anterograde)     | 93.6  | 1.13   | 7  |                                                      |            |
|   | wt TkV:mCherry (anterograde)                   | 65    | 3.42   | 6  | wt to vezl <sup>13.1</sup> (TkV:mCherry)             | 0.0009573  |
|   | vezl <sup>13.1</sup> TkV:mCherry (anterograde) | 90.9  | 1.91   | 6  |                                                      |            |
|   | wt mito:GFP (anterograde)                      | 48    | 5.07   | 7  | wt to vezl <sup>13.1</sup> (mito:GFP)                | 0.3479     |
|   | vezl <sup>13.1</sup> mito:GFP (anterograde)    | 45.2  | 4.7    | 5  |                                                      |            |
|   | wt ANF:GFP (anterograde)                       | 0.47  | 0.05   | 6  | wt to vezl <sup>13.1</sup> (anterograde ANF:GFP)     | 0.1706     |
|   | wt ANF:GFP (retrograde)                        | 0.37  | 0.03   | 6  | wt to vezl <sup>13.1</sup> (retrograde ANF:GFP)      | 0.00001796 |
|   | vezl <sup>13.1</sup> ANF:GFP (anterograde)     | 0.34  | 0.063  | 7  |                                                      |            |
|   | vezl <sup>13.1</sup> ANF:GFP (retrograde)      | 0.02  | 0.0048 | 7  |                                                      |            |
|   | wt TkV:mCherry (anterograde)                   | 0.4   | 0.055  | 6  | wt to vezl <sup>13.1</sup> (anterograde TkV:mCherry) | 0.000166   |
|   | wt TkV:mCherry (retrograde)                    | 0.24  | 0.08   | 6  | wt to vezl <sup>13.1</sup> (retrograde TkV:mCherry)  | 0.0007431  |
|   | vezl <sup>13.1</sup> TkV:mCherry (anterograde) | 0.11  | 0.041  | 6  |                                                      |            |
|   | vezl <sup>13.1</sup> TkV:mCherry (retrograde)  | 0.024 | 0.0075 | 6  |                                                      |            |
|   | wt mito:GFP (anterograde)                      | 0.022 | 0.0046 | 7  | wt to vezl <sup>13.1</sup> (anterograde mito:GFP)    | 0.117      |
|   | wt mito:GFP (retrograde)                       | 0.024 | 0.0061 | 7  | wt to vezl <sup>13.1</sup> (retrograde mito:GFP)     | 0.166      |
|   | vezl <sup>13.1</sup> mito:GFP (anterograde)    | 0.015 | 0.0021 | 5  |                                                      |            |
|   | vezl <sup>13.1</sup> mito:GFP (retrograde)     | 0.017 | 0.0044 | 5  |                                                      |            |
|   | wt ANF:GFP (anterograde)                       | 1.03  | 0.03   | 12 | wt to vezl <sup>13.1</sup> (anterograde ANF:GFP)     | 0.2475     |
|   | wt ANF:GFP (retrograde)                        | 0.77  | 0.03   | 12 | wt to vezl <sup>13.1</sup> (retrograde ANF:GFP)      | 0.002424   |
|   | vezl <sup>13.1</sup> ANF:GFP (anterograde)     | 1.16  | 0.08   | 10 |                                                      |            |
|   | vezl <sup>13.1</sup> ANF:GFP (retrograde)      | 0.57  | 0.06   | 10 |                                                      |            |
|   | wt TkV:mCherry (anterograde)                   | 1.55  | 0.07   | 10 | wt to vezl <sup>13.1</sup> (anterograde TkV:mCherry) | 0.009273   |
|   | wt TkV:mCherry (retrograde)                    | 0.8   | 0.11   | 10 | wt to vezl <sup>13.1</sup> (retrograde TkV:mCherry)  | 0.7723     |
|   | vezl <sup>13.1</sup> TkV:mCherry (anterograde) | 1.13  | 0.04   | 11 |                                                      |            |
|   | vezl <sup>13.1</sup> TkV:mCherry (retrograde)  | 0.73  | 0.08   | 11 |                                                      |            |
|   | wt mito:GFP (anterograde)                      | 0.26  | 0.006  | 10 | wt to vezl <sup>13.1</sup> (anterograde mito:GFP)    | 0.2008     |
|   | wt mito:GFP (retrograde)                       | 0.49  | 0.02   | 10 | wt to vezl <sup>13.1</sup> (retrograde mito:GFP)     | 0.613      |
|   | vezl <sup>13.1</sup> mito:GFP (anterograde)    | 0.32  | 0.09   | 10 |                                                      |            |
|   | vezl <sup>13.1</sup> mito:GFP (retrograde)     | 0.51  | 0.05   | 14 |                                                      |            |

| Figure     | Panel                                                                               |                                                           | Mean  | SEM +/- | n= | comparison                                                      | p-value   |
|------------|-------------------------------------------------------------------------------------|-----------------------------------------------------------|-------|---------|----|-----------------------------------------------------------------|-----------|
| Figure 7   | C                                                                                   | wt Rab5:mRFP                                              | 0.377 | 0.055   | 11 | wt to vez <sup>t</sup> <sup>y624</sup> (Rab5:mRFP)              | 0.3999    |
|            |                                                                                     | vez <sup>t</sup> <sup>y624</sup> Rab5:mRFP                | 0.306 | 0.061   | 9  |                                                                 |           |
|            | D                                                                                   | wt Rab5:mRFP (anterograde)                                | 6.91  | 0.51    | 9  | wt to vez <sup>t</sup> <sup>y624</sup> (anterograde Rab5:mRFP)  | 0.0562    |
|            |                                                                                     | vez <sup>t</sup> <sup>y624</sup> Rab5:mRFP (anterograde)  | 5.37  | 0.54    | 8  |                                                                 |           |
|            |                                                                                     | wt Rab5:mRFP (retrograde)                                 | 3.667 | 0.37    | 10 | wt to vez <sup>t</sup> <sup>y624</sup> (retrograde Rab5:mRFP)   | 0.4655    |
|            |                                                                                     | vez <sup>t</sup> <sup>y624</sup> Rab5:mRFP (retrograde)   | 4.08  | 0.41    | 8  |                                                                 |           |
|            | G                                                                                   | wt Rab7:mRFP                                              | 0.25  | 0.03    | 13 | wt to vez <sup>t</sup> <sup>y624</sup> (Rab7:mRFP)              | 0.0084    |
|            |                                                                                     | vez <sup>t</sup> <sup>y624</sup> Rab7:mRFP                | 0.374 | 0.03    | 14 |                                                                 |           |
|            | H                                                                                   | wt Rab7:mRFP (anterograde)                                | 5.55  | 0.32    | 13 | wt to vez <sup>t</sup> <sup>y624</sup> (anterograde Rab7:mRFP)  | 0.9762    |
|            |                                                                                     | vez <sup>t</sup> <sup>y624</sup> Rab7:mRFP (anterograde)  | 5.56  | 0.32    | 13 |                                                                 |           |
|            |                                                                                     | wt Rab7:mRFP (retrograde)                                 | 3.83  | 0.24    | 12 | wt to vez <sup>t</sup> <sup>y624</sup> (retrograde Rab7:mRFP)   | 0.0472    |
|            |                                                                                     | vez <sup>t</sup> <sup>y624</sup> Rab7:mRFP (retrograde)   | 3.12  | 0.23    | 13 |                                                                 |           |
|            | K                                                                                   | wt Rab11:mRFP                                             | 0.251 | 0.045   | 10 | wt to vez <sup>t</sup> <sup>y624</sup> (anterograde Rab11:mRFP) | 0.2256    |
|            |                                                                                     | vez <sup>t</sup> <sup>y624</sup> Rab11:mRFP               | 0.324 | 0.038   | 14 |                                                                 |           |
|            | L                                                                                   | wt Rab11:mRFP (anterograde)                               | 6.45  | 0.57    | 11 | wt to vez <sup>t</sup> <sup>y624</sup> (anterograde Rab11:mRFP) | 0.9091    |
|            |                                                                                     | vez <sup>t</sup> <sup>y624</sup> Rab11:mRFP (anterograde) | 6.36  | 0.57    | 11 |                                                                 |           |
|            |                                                                                     | wt Rab11:mRFP (retrograde)                                | 4.4   | 0.4     | 11 | wt to vez <sup>t</sup> <sup>y624</sup> (retrograde Rab11:mRFP)  | 0.9618    |
|            |                                                                                     | vez <sup>t</sup> <sup>y624</sup> Rab11:mRFP (retrograde)  | 4.42  | 0.36    | 11 |                                                                 |           |
| Figure 7   | Rab area (μm <sup>2</sup> ) per axon (alternative normalization of data in C, G, K) | wt Rab5:mRFP                                              | 19.46 | 3.79    | 11 | wt to vez <sup>t</sup> <sup>y624</sup> (Rab5:mRFP)              | 0.156     |
|            |                                                                                     | vez <sup>t</sup> <sup>y624</sup> Rab5:mRFP                | 27.8  | 4.18    | 9  |                                                                 |           |
|            |                                                                                     | wt Rab7:mRFP                                              | 13.73 | 3.21    | 11 | wt to vez <sup>t</sup> <sup>y624</sup> (Rab7:mRFP)              | 0.0181    |
|            |                                                                                     | vez <sup>t</sup> <sup>y624</sup> Rab7:mRFP                | 24.65 | 2.85    | 14 |                                                                 |           |
|            |                                                                                     | wt Rab11:mRFP                                             | 14.4  | 2.57    | 8  | wt to vez <sup>t</sup> <sup>y624</sup> (Rab11:mRFP)             | 0.7501    |
| Supp Fig 2 | E                                                                                   | wt                                                        | 2.25  | 0.11    | 13 | wt to vez <sup>t</sup> <sup>13.1</sup>                          | 3.25E-08  |
|            |                                                                                     | vez <sup>t</sup> <sup>13.1</sup>                          | 1.15  | 0.09    | 14 |                                                                 |           |
| Supp Fig 3 | B                                                                                   | wt                                                        | 32    | 1.3     | 11 | wt to vez <sup>t</sup> <sup>13.1</sup>                          | 0.0000137 |
|            |                                                                                     | vez <sup>t</sup> <sup>13.1</sup>                          | 18.17 | 1.8     | 7  |                                                                 |           |
|            |                                                                                     | wt + hVezt                                                | 29.25 | 1.9     | 8  |                                                                 |           |
|            |                                                                                     | vez <sup>t</sup> <sup>13.1</sup> + hVezt                  | 18.3  | 1.1     | 13 | wt to vez <sup>t</sup> <sup>13.1</sup> + hVezt                  | 5.27E-08  |
| Supp Fig 4 | G                                                                                   | wt (anti-p150)                                            | 0.737 | 0.048   | 40 | wt to vez <sup>t</sup> <sup>y624</sup> (anti-p150)              | 0.0224    |
|            |                                                                                     | vez <sup>t</sup> <sup>y624</sup> (anti-p150)              | 0.911 | 0.057   | 28 |                                                                 |           |
|            |                                                                                     | wt (anti-Dync1h1)                                         | 0.841 | 0.089   | 11 | wt to vez <sup>t</sup> <sup>y624</sup> (anti-Dync1h1)           | 0.3055    |
|            |                                                                                     | vez <sup>t</sup> <sup>y624</sup> (anti-Dync1h1)           | 0.968 | 0.082   | 13 |                                                                 |           |
|            |                                                                                     | wt (anti-CytoC)                                           | 0.856 | 0.057   | 14 | wt to vez <sup>t</sup> <sup>y624</sup> (anti-CytoC)             | 0.6339    |
|            |                                                                                     | vez <sup>t</sup> <sup>y624</sup> (anti-CytoC)             | 0.895 | 0.059   | 13 |                                                                 |           |
